# Supplementary material
Source: Royal Society of Chemistry journal article supplement (doi:10.1039/d6qi00862c)
Supplement: d6qi00862c1.pdf [file d6qi00862c1.pdf]

A

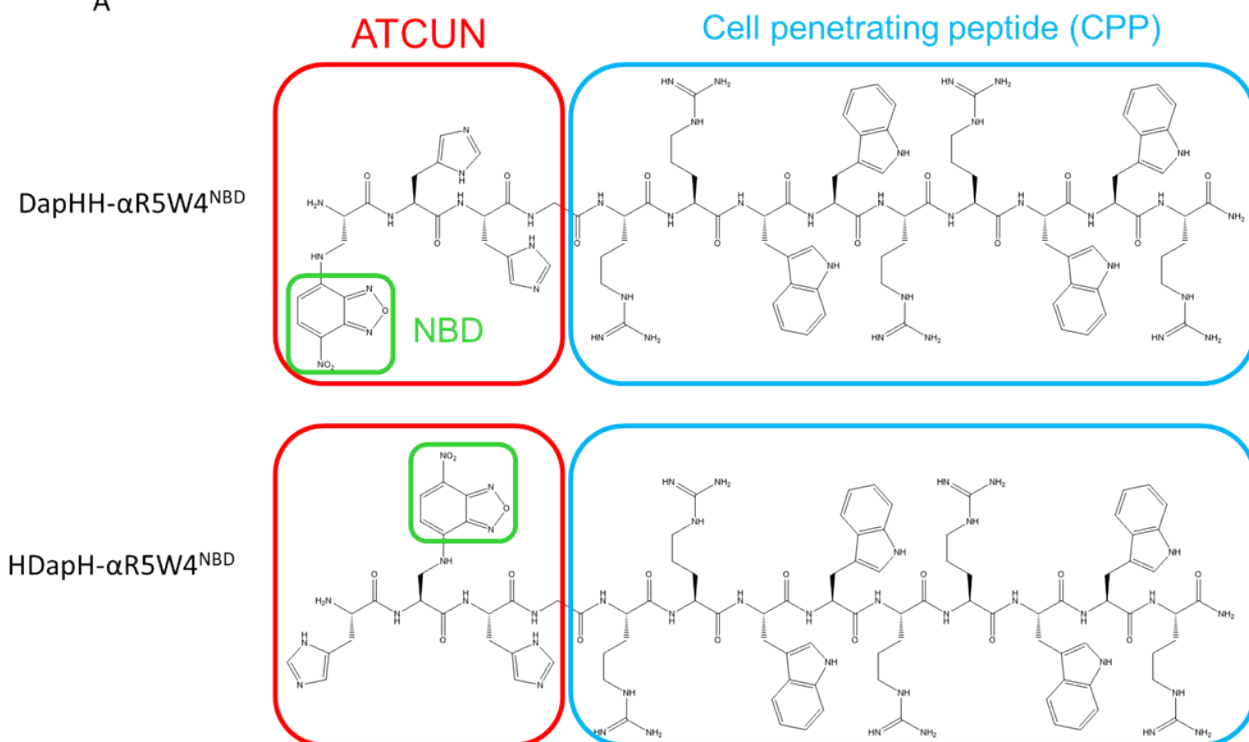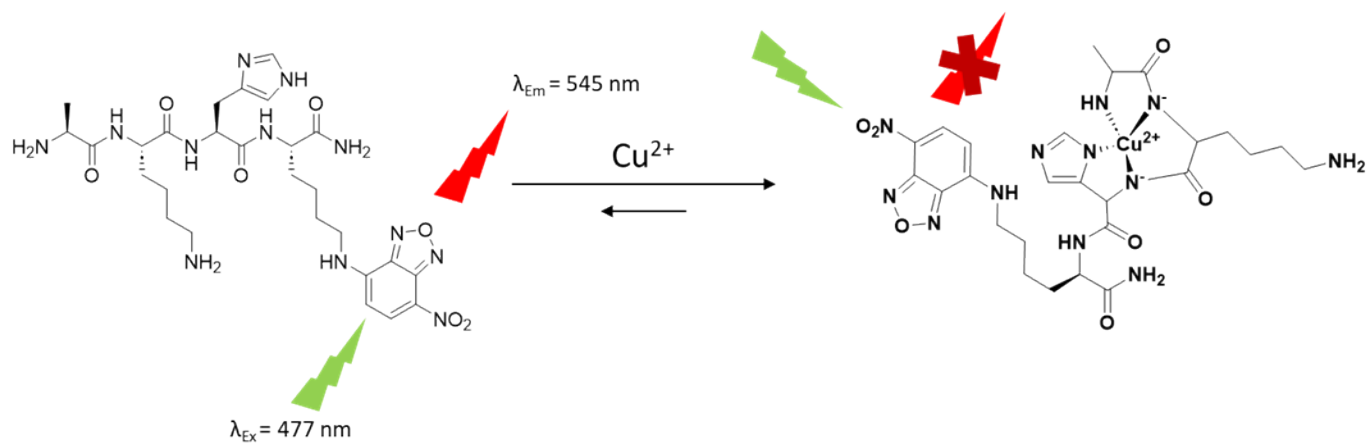

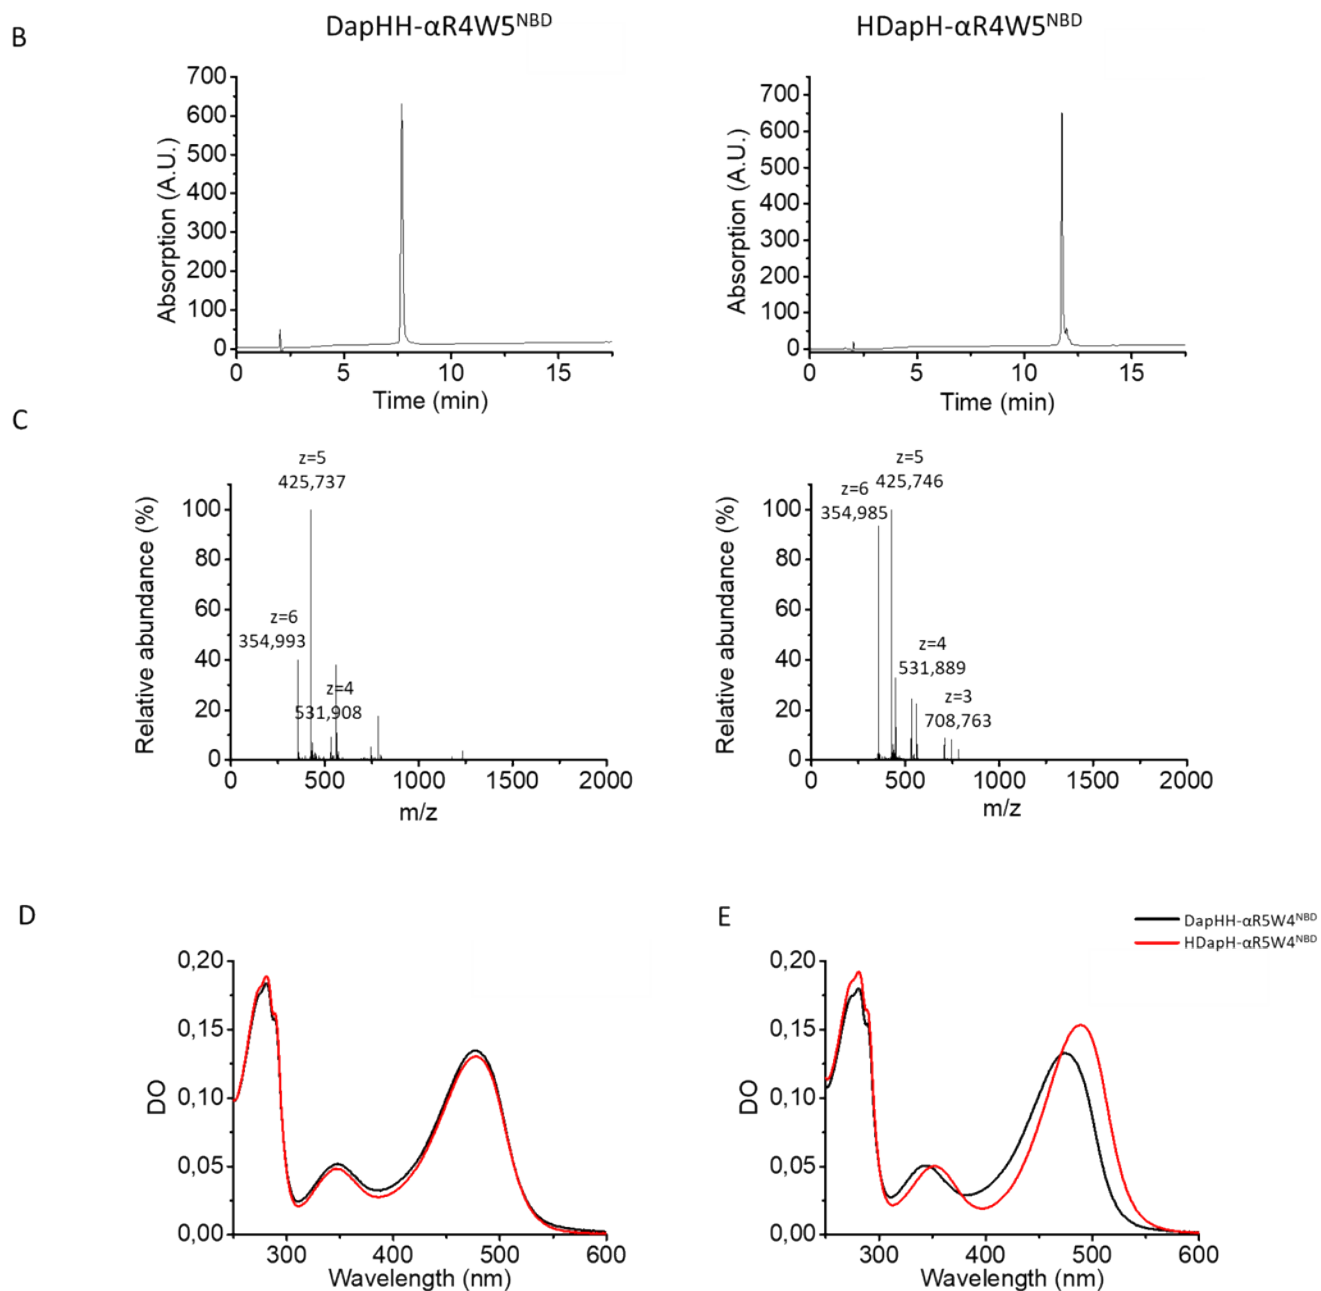

Figure S1: (A) Amino acid sequence of DapHH- $\alpha$ R5W4<sup>NBD</sup> and HDapH- $\alpha$ R5W4<sup>NBD</sup> with the structure of the ATCUN motif free and coordinated with Cu(II). (B) HPLC chromatogram of purified DapHH- $\alpha$ R4W5<sup>NBD</sup> and HDapH- $\alpha$ R4W5<sup>NBD</sup>. The separation was performed using a linear gradient of buffer A (TFA 0.1%) and buffer B (TFA 0.1%, ACN 90%) ranging from 5% buffer B to 100% buffer B in 30 min, flow 1 ml/min, and UV detection at 214 nm. (C) MS of major peak in LC spectra of purified DapHH- $\alpha$ R4W5<sup>NBD</sup> and HDapH- $\alpha$ R4W5<sup>NBD</sup>. The separation was performed using a linear gradient of buffer A (Formic acid 0.1%) and buffer B (Formic acid 0.1%, ACN 90%) ranging from 5% buffer B to 100% buffer B in 15 min, flow 1 ml/min, and m/z detection from 100 to 2000 Da. (D) UV-Vis spectra of DapHH- $\alpha$ R5W4<sup>NBD</sup> and HDapH- $\alpha$ R5W4<sup>NBD</sup> in 100 mM HEPES or (E) Cu(II)DapHH- $\alpha$ R5W4<sup>NBD</sup> and Cu(II)HDapH- $\alpha$ R5W4<sup>NBD</sup>. Conditions: Cu(II)DapHH- $\alpha$ R5W4<sup>NBD</sup>=Cu(II)HDapH- $\alpha$ R5W4<sup>NBD</sup>= 5  $\mu$ M, HEPES 100 mM pH 7.4, 25°C. Representative traces of n=2 independent experiments are shown.

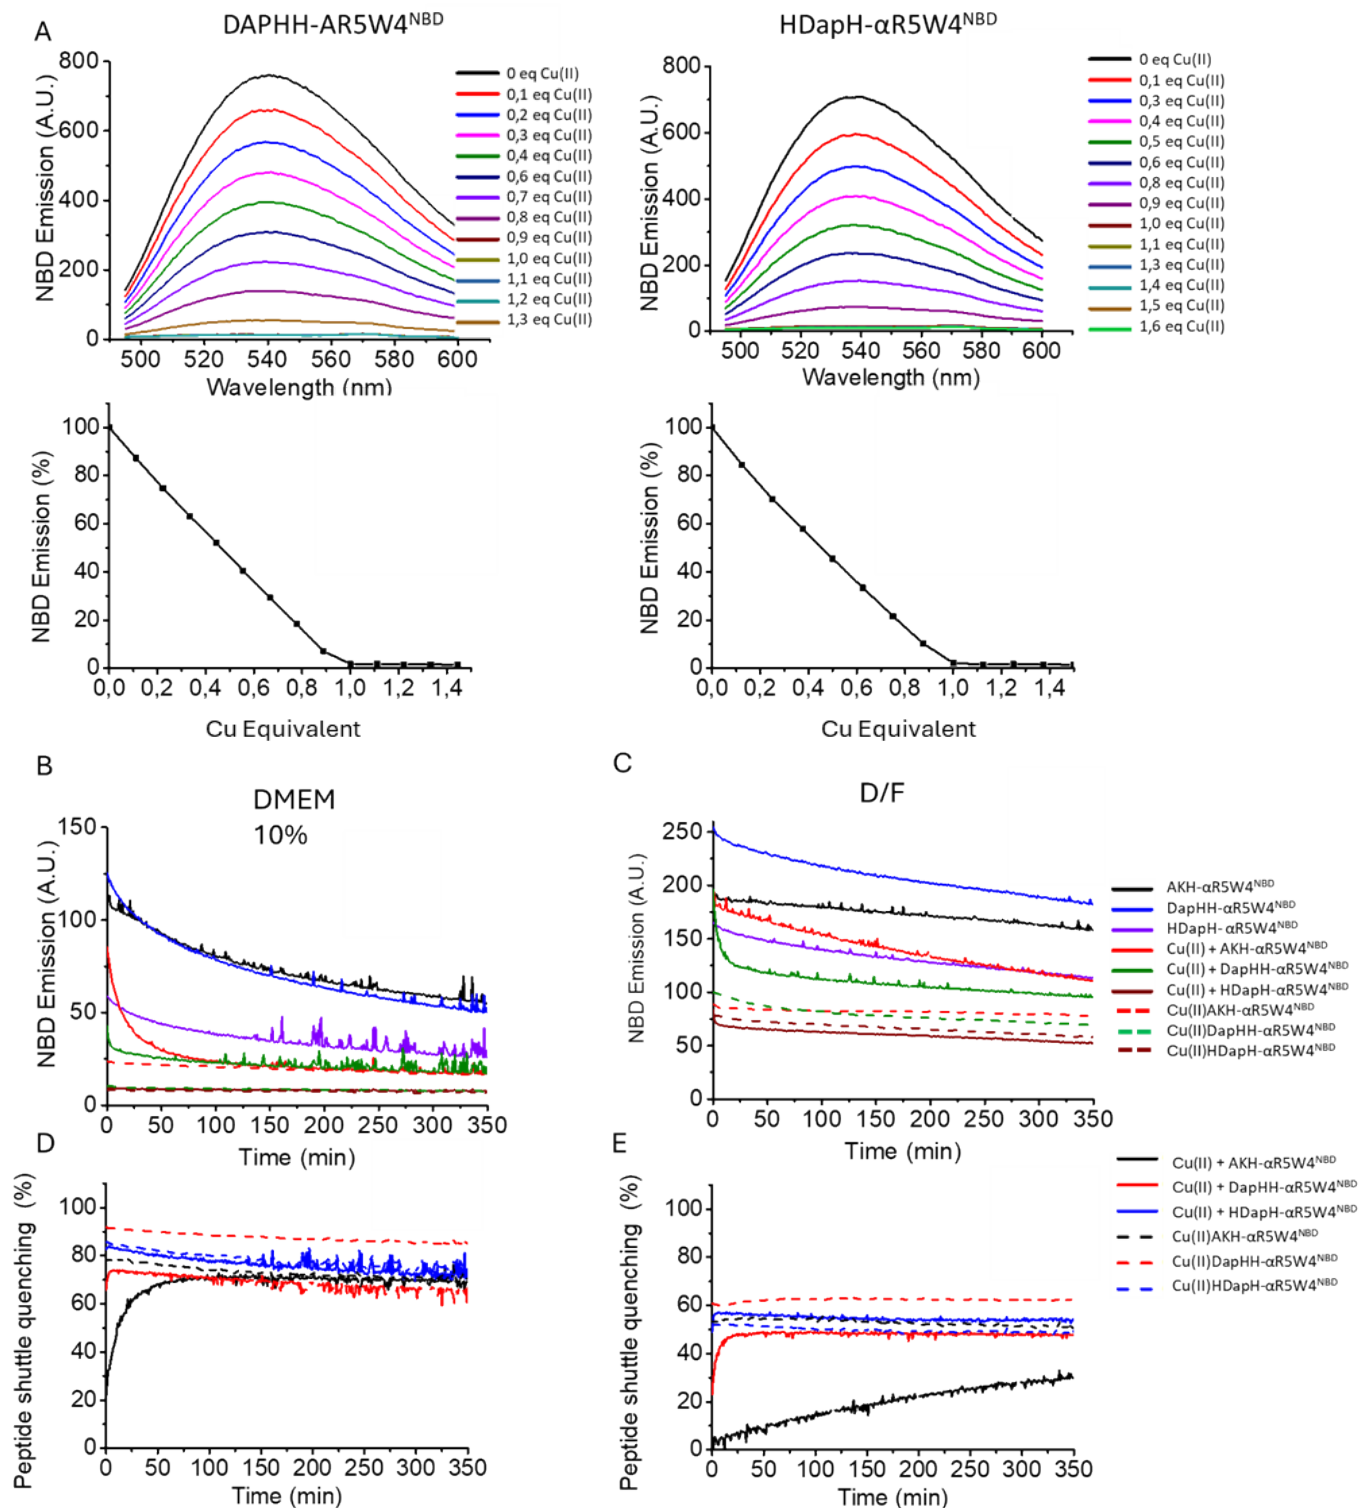

Figure S2: (A) Fluorescence spectra of DapHH- $\alpha$ R5W4<sup>NBD</sup> and HDapH- $\alpha$ R5W4<sup>NBD</sup> along with their respective linear Cu(II) dependent quenching. Spectra taken after additions of 0.1 equivalent Cu(II) and fluorescence intensity was monitored at 545 nm. Conditions: 4  $\mu$ M peptides shuttles, addition of Cu(II) ; 0.1 equivalent = 0.4  $\mu$ M ; HEPES Buffer 100 mM pH 7.4. Excitation wavelength: 477 nm; Emission spectra: 490-600 nm. Representative traces of n=2

independent experiments are shown. (B) Withdrawal of Cu(II) by peptide shuttles in cell culture media. NBD emission of AKH- $\alpha$ R5W4<sup>NBD</sup>, DapHH- $\alpha$ R5W4<sup>NBD</sup> or HDapH- $\alpha$ R5W4<sup>NBD</sup> in DMEM 10% or (C) D/F, in the presence or absence of Cu(II), monitored at 545 nm. Dashed lines represent the emission of peptide shuttles precomplexed to Cu(II), thus the maximum theoretical quench. (D) Normalised percentage of AKH- $\alpha$ R5W4<sup>NBD</sup>, DapHH- $\alpha$ R5W4<sup>NBD</sup> or HDapH- $\alpha$ R5W4<sup>NBD</sup> in DMEM 10% (E) or D/F, in the presence or absence of Cu(II) at 545 nm. Dashed lines represent the emission of peptide shuttles precomplexed to Cu(II), thus the maximal theoretical quench (See Formula S1 below). Conditions: Cu(II)=AKH- $\alpha$ R5W4<sup>NBD</sup>=DapHH- $\alpha$ R5W4<sup>NBD</sup>=HDapH- $\alpha$ R5W4<sup>NBD</sup>= 5  $\mu$ M, DMEM 10%, D/F 100%, 25°C. Representative traces of n=3 independent experiments are shown.

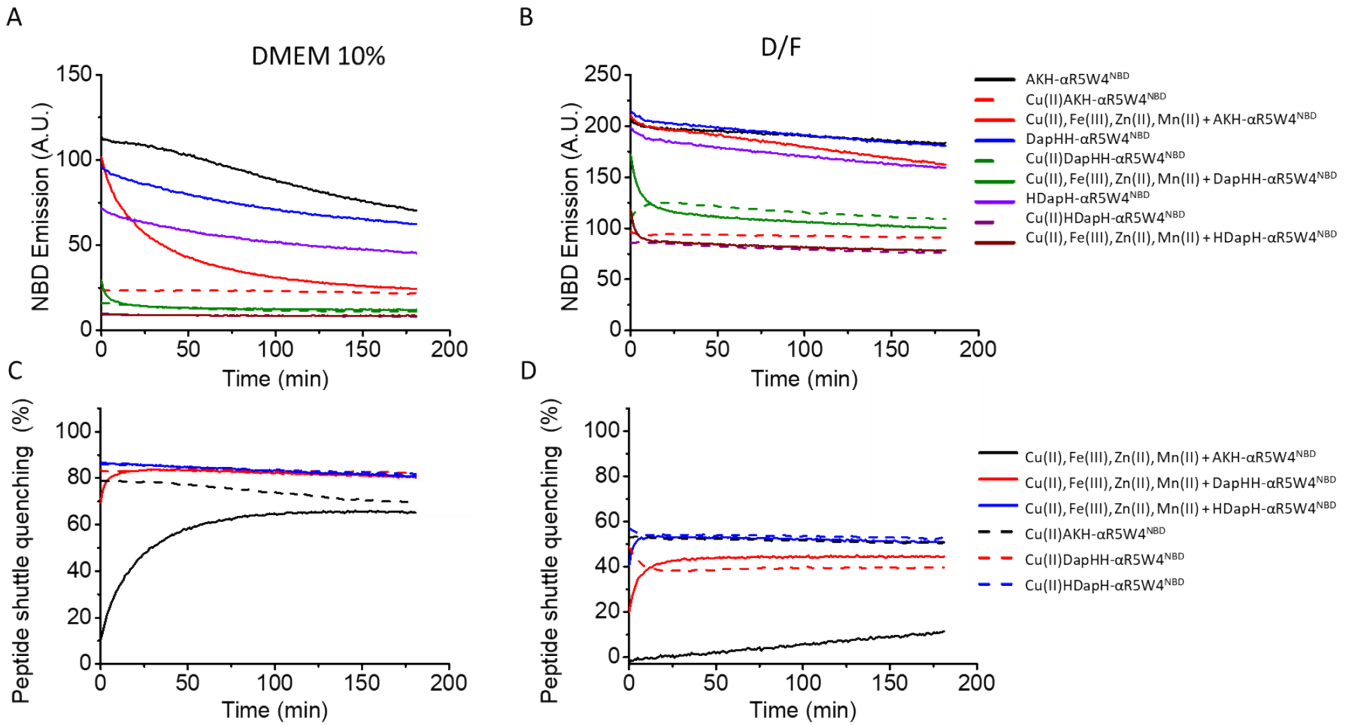

Figure S3: Selective withdrawal of Cu(II) by peptide shuttles in cell culture media containing Cu(II), Fe (III), Zn(II) and Mn(II). (A) NBD emission of AKH- $\alpha$ R5W4<sup>NBD</sup>, DapHH- $\alpha$ R5W4<sup>NBD</sup> or HDapH- $\alpha$ R5W4<sup>NBD</sup> in DMEM 10% (B) or D/F, in the presence or absence of Cu(II) at 545 nm. Dashed lines represent the emission of peptide shuttles precomplexed to Cu(II), thus the maximum theoretical quench. (C) Normalised percentage of AKH- $\alpha$ R5W4<sup>NBD</sup>, DapHH- $\alpha$ R5W4<sup>NBD</sup> or HDapH- $\alpha$ R5W4<sup>NBD</sup> in DMEM 10% (D) or D/F, in the presence or absence of Cu(II) at 545 nm. Dashed lines represent the emission of peptide shuttles precomplexed to Cu(II), thus the maximal theoretical quench (See Formula S1 below). Conditions: Cu(II)=AKH- $\alpha$ R5W4<sup>NBD</sup>=DapHH- $\alpha$ R5W4<sup>NBD</sup>=HDapH- $\alpha$ R5W4<sup>NBD</sup>= 5  $\mu$ M, DMEM 10%, D/F 100%, 25°C. Representative traces of n=3 independent experiments are shown.

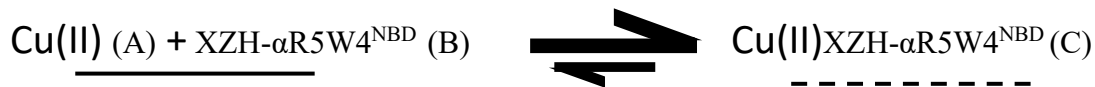

$$\left\{ 1 - \frac{(C)_t}{(B)_t} \right\} \times 100 = \text{maximal theoretical quench (\%)}$$

$$\left\{ 1 - \frac{(A+B)_t}{(B)_t} \right\} \times 100 = \% \text{ Shuttle quenching at timepoint (t)}$$

Formula S1: Calculation of Peptide Shuttle quenching (%) for Figure S2D,E and Figure S3C,D. The maximal theoretical quench is derived by dividing the fluorescence emission of Cu(II)XZH- $\alpha$ R5W4<sup>NBD</sup> by the emission of XZH- $\alpha$ R5W4<sup>NBD</sup> peptide shuttles (Dashed lines). % Shuttle quenching at timepoint (t) is derived by dividing the fluorescence emission of Cu(II) + XZH- $\alpha$ R5W4<sup>NBD</sup> by the emission of XZH- $\alpha$ R5W4<sup>NBD</sup> peptide shuttles (Bold lines).

|                                                    | Cu(II)                           |                                 | Cu(II) + Fe (III) + Zn(II) + Mn(II) |                                 |
|----------------------------------------------------|----------------------------------|---------------------------------|-------------------------------------|---------------------------------|
|                                                    | DMEM 10% (min)                   | D/F (min)                       | DMEM 10% (min)                      | D/F (min)                       |
| <b>AKH-<math>\alpha</math>R5W4<sup>NBD</sup></b>   | <b>22.0 <math>\pm</math> 2.4</b> | <b>N/A</b>                      | <b>40.3 <math>\pm</math> 5.7</b>    | <b>N/A</b>                      |
| <b>DapHH-<math>\alpha</math>R5W4<sup>NBD</sup></b> | <b>&lt;1 min</b>                 | <b>4.3 <math>\pm</math> 0.6</b> | <b>&lt;1 min</b>                    | <b>5.5 <math>\pm</math> 0.6</b> |
| <b>HDapH-<math>\alpha</math>R5W4<sup>NBD</sup></b> | <b>&lt;1 min</b>                 | <b>&lt;1 min</b>                | <b>&lt;1 min</b>                    | <b>&lt;1 min</b>                |

Table S1: Average half-time of Cu(II) withdrawal from DMEM 10% or D/F media, in the presence or absence of other d-block metals, by AKH- $\alpha$ R5W4<sup>NBD</sup>, DapHH- $\alpha$ R5W4<sup>NBD</sup> or HDapH- $\alpha$ R5W4<sup>NBD</sup>, n=3.

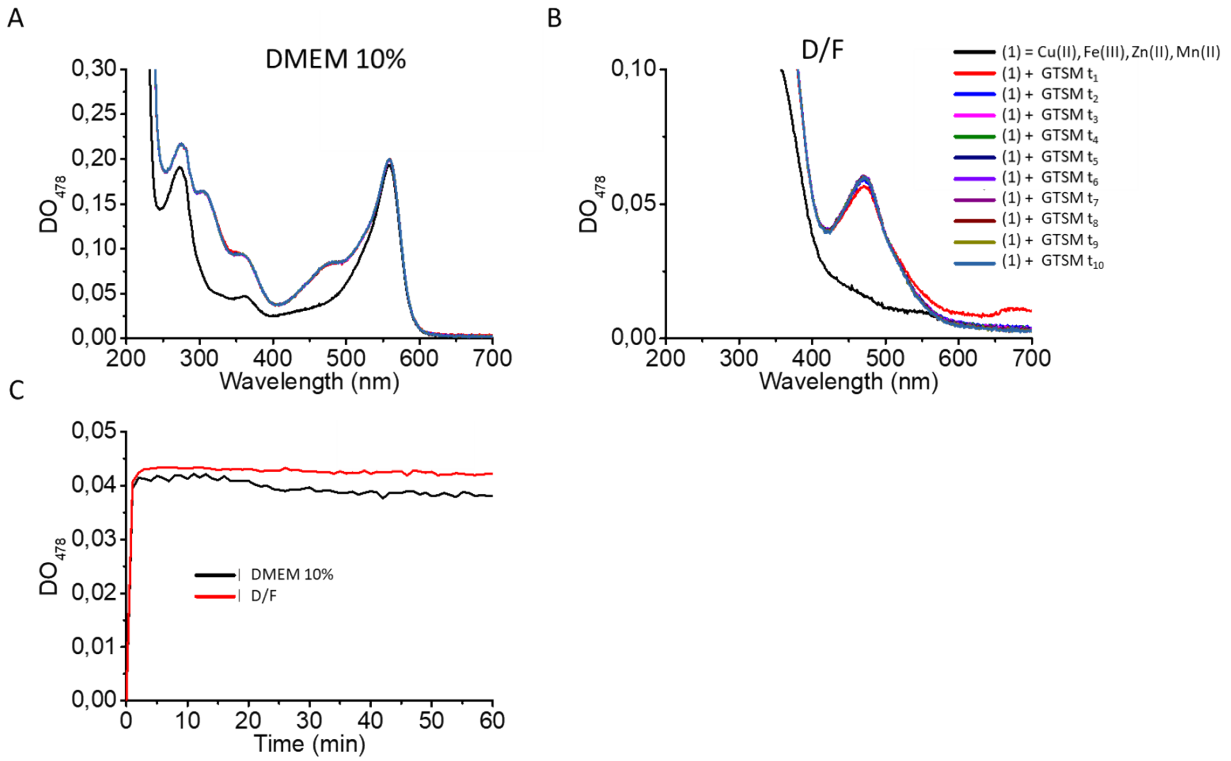

Figure S4: Selective withdrawal of Cu(II) by GTSM in cell culture media containing Cu(II), Fe(III), Zn(II) and Mn(II). d-d band absorption of Cu(II)GTSM in (A) DMEM 10% or (B) D/F media with an absorption maximum at 477 nm. (C) Net increase in absorption at 477 nm by Cu(II)GTSM complex in DMEM 10% vs D/F. Conditions: Cu(II)=GTSM= 5 $\mu$ M, DMEM 10%, D/F 100%, 25°C.

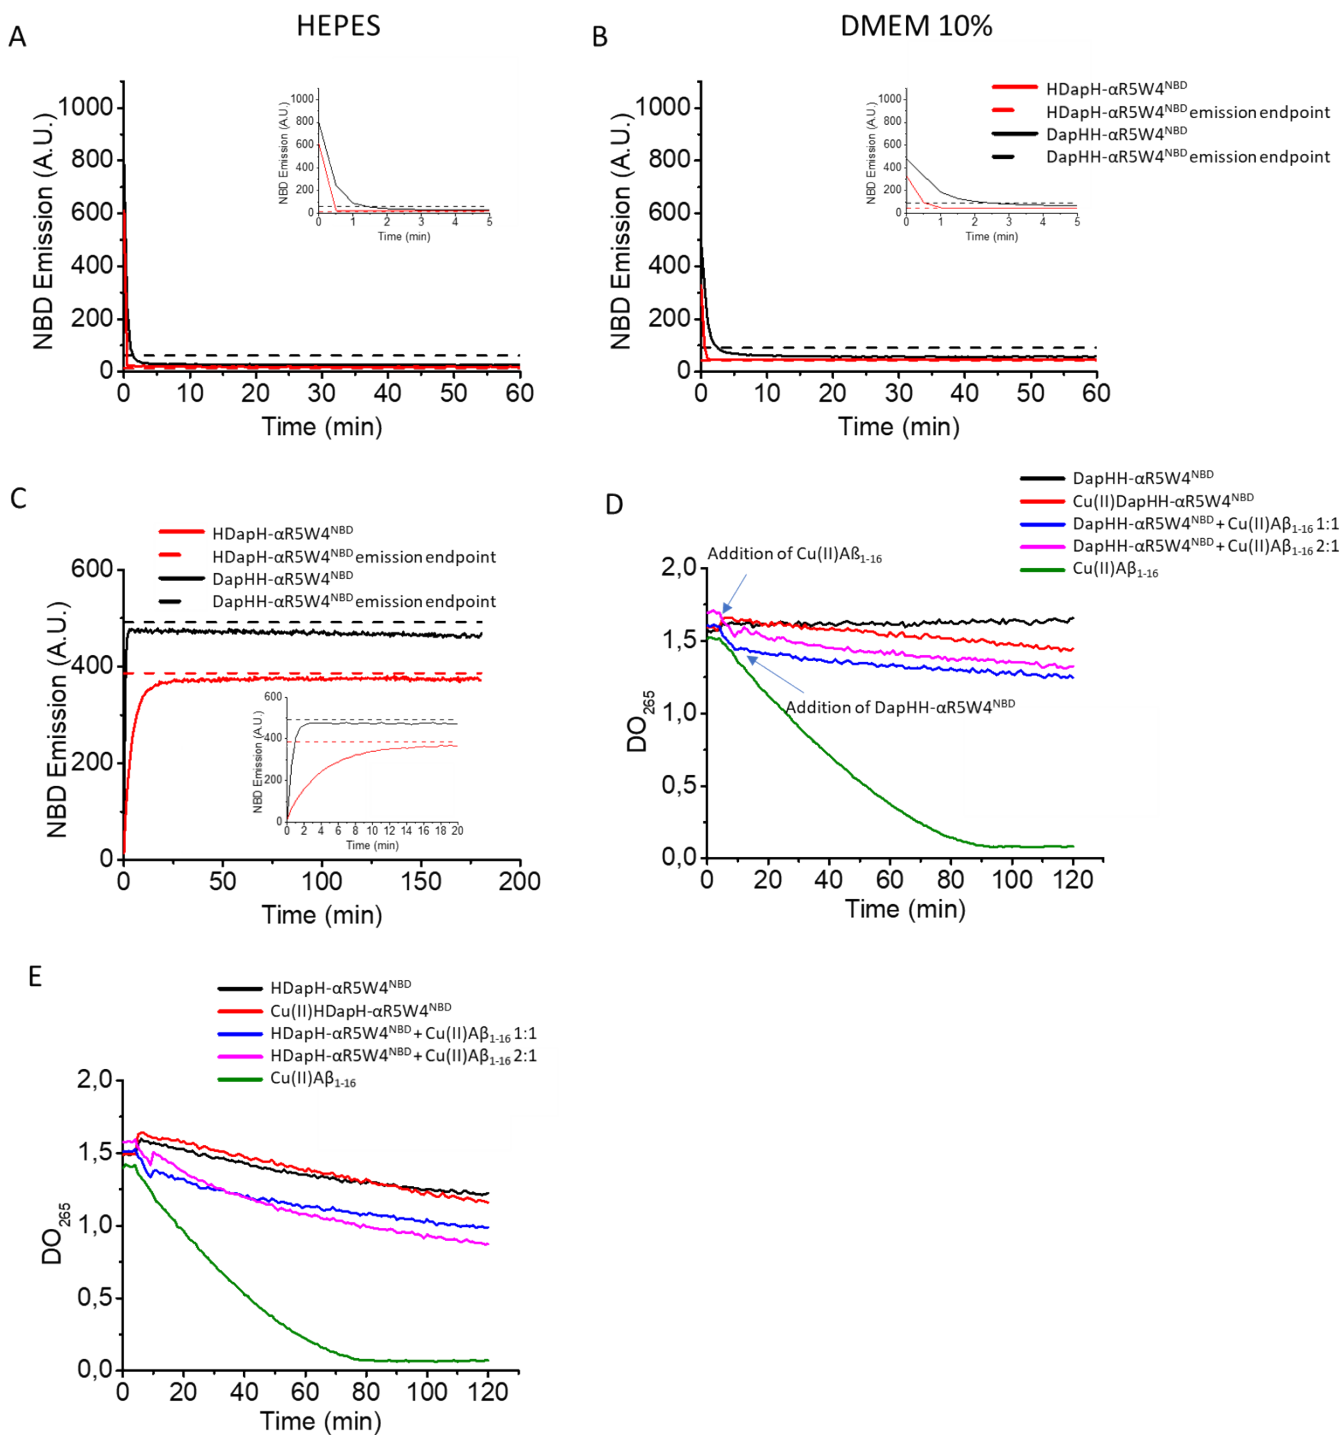

Figure S5: (A) Retrieval of Cu(II) from  $\beta$ <sub>1-16</sub> by DapHH- $\alpha$ R5W4<sup>NBD</sup> (black line) and HDapH- $\alpha$ R5W4<sup>NBD</sup>(red line), in HEPES or (B) DMEM 10% media. Dashed lines indicate the expected emission endpoint of DapHH- $\alpha$ R5W4<sup>NBD</sup> (black) and HDapH- $\alpha$ R5W4<sup>NBD</sup> (red), respectively, in the presence of Cu(II) in a 1:1 complex. Conditions: DapHH- $\alpha$ R5W4<sup>NBD</sup>=HDapH- $\alpha$ R5W4<sup>NBD</sup>= 5  $\mu$ M;  $\beta$ <sub>1-16</sub>=10  $\mu$ M; Cu(II)=5  $\mu$ M, HEPES 100 mM pH 7.4, 25°C. Representative traces of n=3 independent experiments are shown. (C) Reduction of Cu(II) bound to DapHH- $\alpha$ R5W4<sup>NBD</sup> and HDapH- $\alpha$ R5W4<sup>NBD</sup> by glutathione (GSH) in HEPES buffer pH 7.4 monitored by the increase in NBD fluorescence at 545 nm over time. Black and red dashes, marks the expected emission endpoint (emission in the absence of Cu(II)) of DapHH- $\alpha$ R5W4<sup>NBD</sup> and HDapH- $\alpha$ R5W4<sup>NBD</sup>, respectively. Conditions: Cu(II)DapHH- $\alpha$ R5W4<sup>NBD</sup>=Cu(II)HDapH-

$\alpha$ R5W4<sup>NBD</sup> = 5  $\mu$ M, 5 mM GSH, HEPES 100 mM pH 7.4, 37°C; n=3 independent experiments. (D) Retrieval of Cu(II) from A $\beta$ <sub>1-16</sub> by DapHH- $\alpha$ R5W4<sup>NBD</sup> or (E) HDapH- $\alpha$ R5W4<sup>NBD</sup> halts ROS production. Inhibition of AscH<sup>-</sup> consumption by DapHH- $\alpha$ R5W4<sup>NBD</sup> or HDapH- $\alpha$ R5W4<sup>NBD</sup> monitored by the absorbance of AscH<sup>-</sup> at 265 nm. Addition of AscH<sup>-</sup> was carried out at t<sub>0</sub> and Cu(II)A $\beta$ <sub>1-16</sub> at t<sub>5</sub> and addition of XYH- $\alpha$ R5W4<sup>NBD</sup> (DapHH- $\alpha$ R5W4<sup>NBD</sup> or HDapH- $\alpha$ R5W4<sup>NBD</sup>) at t<sub>10</sub>. Conditions: AscH<sup>-</sup> = 100  $\mu$ M, Cu(II)DapHH- $\alpha$ R5W4<sup>NBD</sup>=Cu(II)HDapH- $\alpha$ R5W4<sup>NBD</sup> = 5  $\mu$ M, A $\beta$ <sub>1-16</sub> = 10  $\mu$ M, Cu(II) = 5  $\mu$ M, HEPES 100 mM pH 7.4. n=3 independent experiments.

|                                     | A $\beta$ <sub>1-16</sub> |              | GSH         |
|-------------------------------------|---------------------------|--------------|-------------|
|                                     | HEPES (s)                 | DMEM 10% (s) | HEPES (s)   |
| DapHH- $\alpha$ R5W4 <sup>NBD</sup> | 29.9 ± 5.2                | 47.9 ± 9.2   | 35.1 ± 1.9  |
| HDapH- $\alpha$ R5W4 <sup>NBD</sup> | 6.6 ± 0.4                 | 14.5 ± 3.8   | 241.9 ± 4.3 |

Table S2: Kinetics of Cu(II) transfer from A $\beta$ <sub>1-16</sub> to DapHH- $\alpha$ R5W4<sup>NBD</sup> and HDapH- $\alpha$ R5W4<sup>NBD</sup> in HEPES or 10% DMEM. Conditions: DapHH- $\alpha$ R5W4<sup>NBD</sup>=HDapH- $\alpha$ R5W4<sup>NBD</sup>=Cu(II) = 5  $\mu$ M, A $\beta$ <sub>1-16</sub>=10  $\mu$ M, 100 mM HEPES pH 7.4, 10% DMEM, 25°C; n=3. (b) Reduction kinetics of Cu(II) on DapHH- $\alpha$ R5W4<sup>NBD</sup> or HDapH- $\alpha$ R5W4<sup>NBD</sup> by 5 mM GSH. Conditions: Cu(II)DapHH- $\alpha$ R5W4<sup>NBD</sup>=Cu(II)HDapH- $\alpha$ R5W4<sup>NBD</sup> = 5  $\mu$ M, 5 mM GSH, HEPES 100 mM pH 7.4; 37°C; n=3 independent experiments.

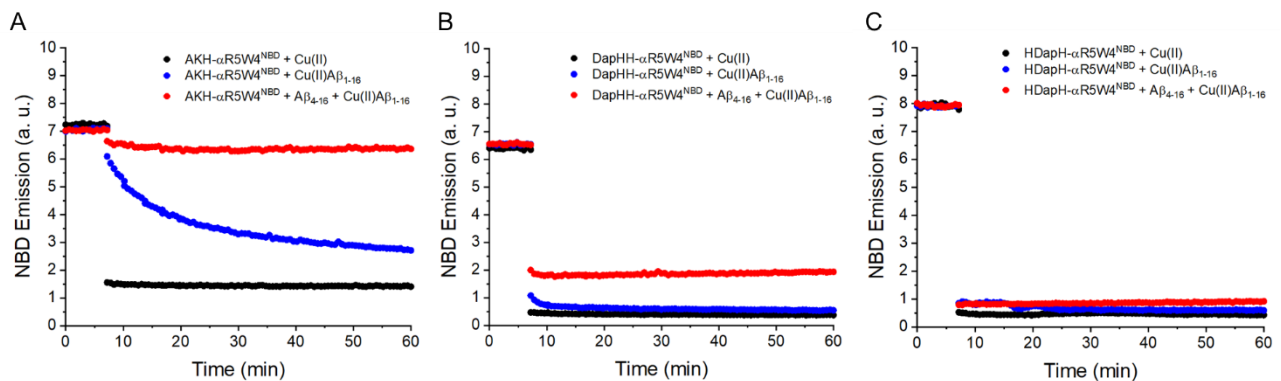

Figure S6. Retrieval of Cu(II) from A $\beta$ <sub>1-16</sub> by (A) AKH- $\alpha$ R5W4<sup>NBD</sup>, (B) DapHH- $\alpha$ R5W4<sup>NBD</sup>, (C) HDapH- $\alpha$ R5W4<sup>NBD</sup> in the absence (blue) or presence of A $\beta$ <sub>4-16</sub> (red). As controls, the addition of Cu(II) to the shuttles is reported in black. Conditions: AKH- $\alpha$ R5W4<sup>NBD</sup>=DapHH- $\alpha$ R5W4<sup>NBD</sup>=HDapH- $\alpha$ R5W4<sup>NBD</sup>=A $\beta$ <sub>1-16</sub>=A $\beta$ <sub>4-16</sub>=Cu(II) = 5  $\mu$ M; HEPES 100 mM pH 7.4, 25°C. Shuttles and A $\beta$ <sub>4-16</sub> were pre-incubated before addition of Cu(II) or Cu(II)A $\beta$ <sub>1-16</sub>.

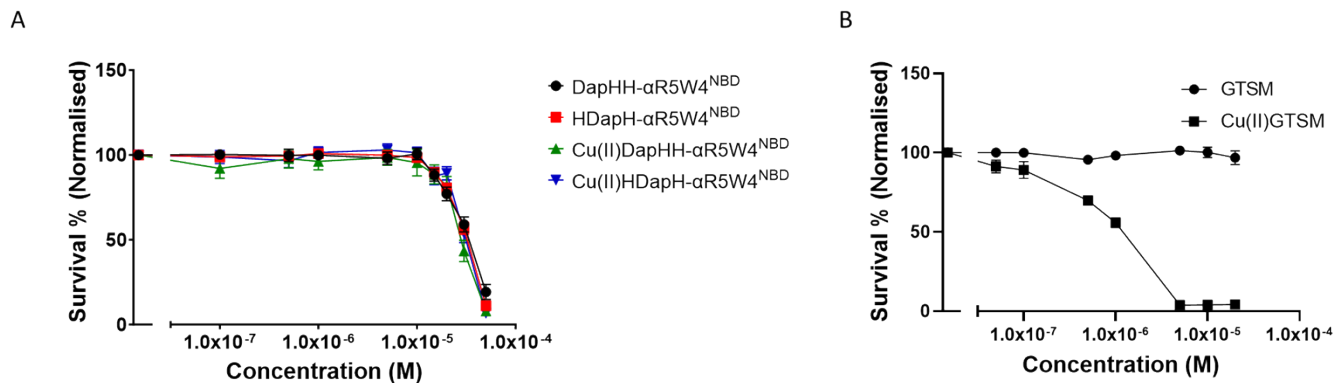

Figure S7: (A) Viability of PC12 after treatment with DapHH- $\alpha$ R5W4<sup>NBD</sup> or HDapH- $\alpha$ R5W4<sup>NBD</sup> alone or precomplexed with Cu(II). (B) Viability of PC12 after treatment with GTSM alone or precomplexed with Cu(II). Conditions:  $5 \times 10^4$  PC12 cells were incubated with the indicated concentration of peptides for 24h in 100% DMEM media.

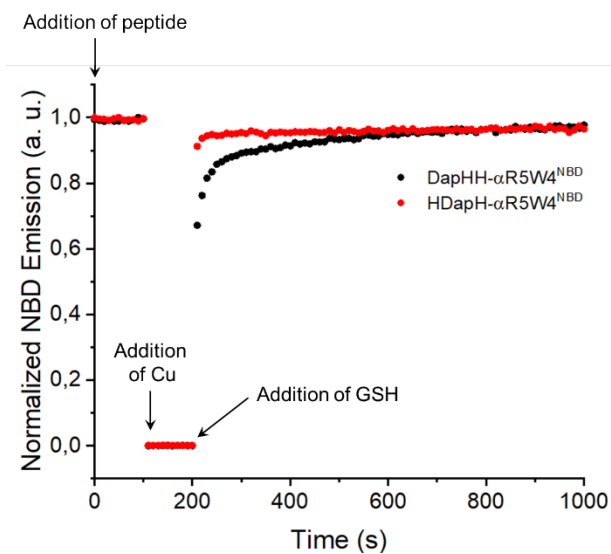

Figure S8. Reduction of Cu(II) bound to DapHH- $\alpha$ R5W4<sup>NBD</sup> (black dots) and HDapH- $\alpha$ R5W4<sup>NBD</sup> (red dots) by glutathione (GSH) in MES buffer pH 5 monitored by the increase in NBD fluorescence at 545 nm over time. Conditions: Cu(II)DapHH- $\alpha$ R5W4<sup>NBD</sup>=Cu(II)HDapH- $\alpha$ R5W4<sup>NBD</sup>=  $5 \mu$ M, 5 mM GSH, HEPES 100 mM pH 7.4, 25 °C.

A

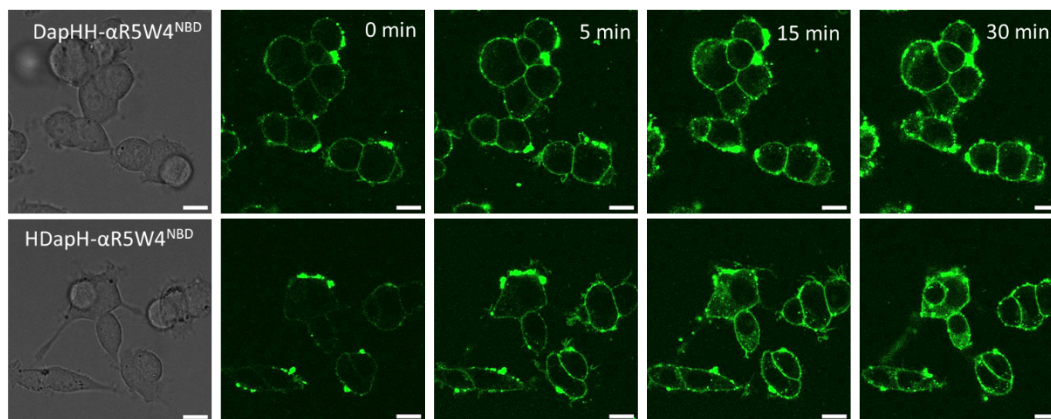

B

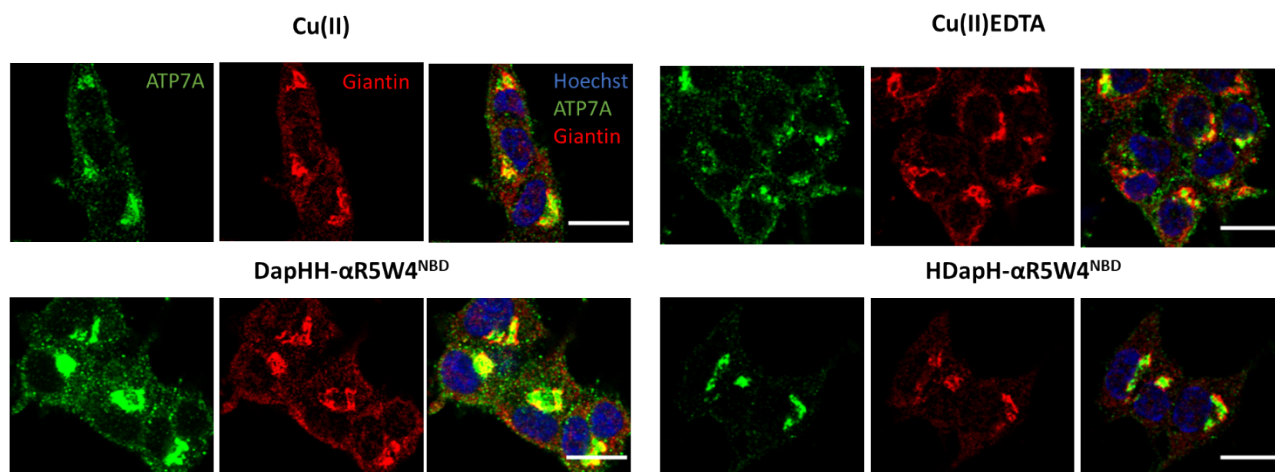

Figure S9: (A) Penetration of second-generation peptide shuttles into PC12 cells. Representative images at the indicated time obtained from live imaging performed on  $5 \times 10^4$  PC12 cells incubated with  $5 \mu\text{M}$  DapHH- $\alpha\text{R5W4}^{\text{NBD}}$  or HDapH- $\alpha\text{R5W4}^{\text{NBD}}$ , at  $37^\circ\text{C}$  using a Leica TCS SP5 (II) confocal microscope, with an excitation wavelength at  $477 \text{ nm}$  for  $30 \text{ min}$ . Time point zero is about 1 minute after incubation with the peptides. Bars =  $10 \mu\text{M}$ . Similar observations were obtained with at least 3 independent cell passages. (B) Colocalization between ATP7A and Giantin staining. PC12 cells were incubated for 1h in DMEM media alone (control = Ctrl) or,  $5 \mu\text{M}$  Cu(II), Cu(II)-EDTA, DapHH- $\alpha\text{R5W4}^{\text{NBD}}$ , Cu(II)DapHH- $\alpha\text{R5W4}^{\text{NBD}}$ , Cu(II)HDapH- $\alpha\text{R5W4}^{\text{NBD}}$ , HDapH- $\alpha\text{R5W4}^{\text{NBD}}$  or  $1 \mu\text{M}$  Cu(II)-GTSM, before fixation and processed for immunostaining; Blue: Hoechst (Nucleus marker); Green: ATP7A; Red: Giantin (Golgi marker). Representative images are shown. Bars =  $10 \mu\text{m}$ .  $n=3$  independent experiments.

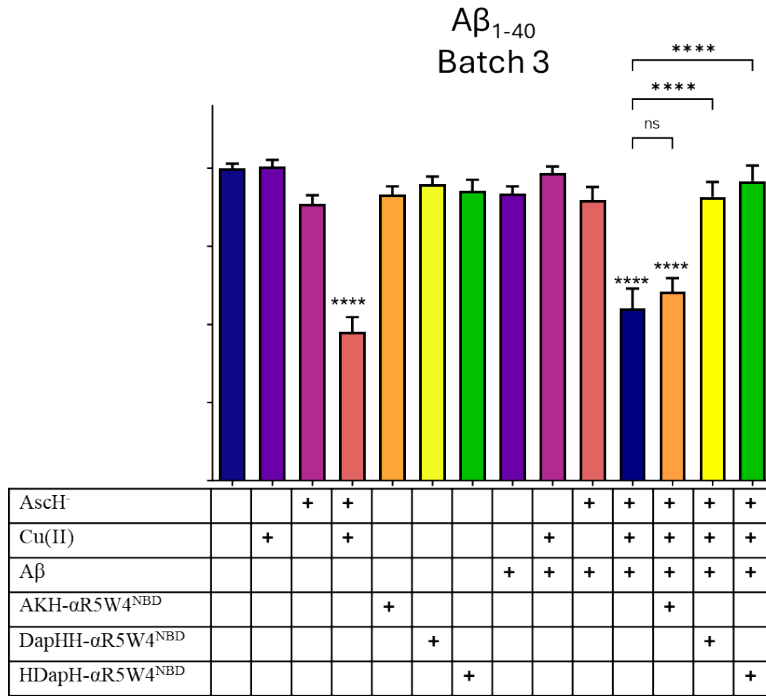

Figure S10: Transfer of Cu(II) from  $A\beta_{1-40}$  batch 3 to ATCUN motif prevents Cu-induced ROS production and toxicity to PC12 cells. PC12 cells were incubated with 5  $\mu$ M AKH- $\alpha$ R5W4<sup>NBD</sup>, DapHH- $\alpha$ R5W4<sup>NBD</sup> or HDapH- $\alpha$ R5W4<sup>NBD</sup> with 10  $\mu$ M Cu(II) $A\beta_{1-40}$  0.5:1 and 500  $\mu$ M AscH for 24h. Experiments were done in triplicates, n=3. A parametric ordinary one-way ANOVA test was carried out with a Tukey's multiple comparison Test \* p<0,05, \*\* p<0,01, \*\*\*\* p<0,0001. Experiments were carried out in 10% DMEM. "+" signifies presence of a particular molecule.

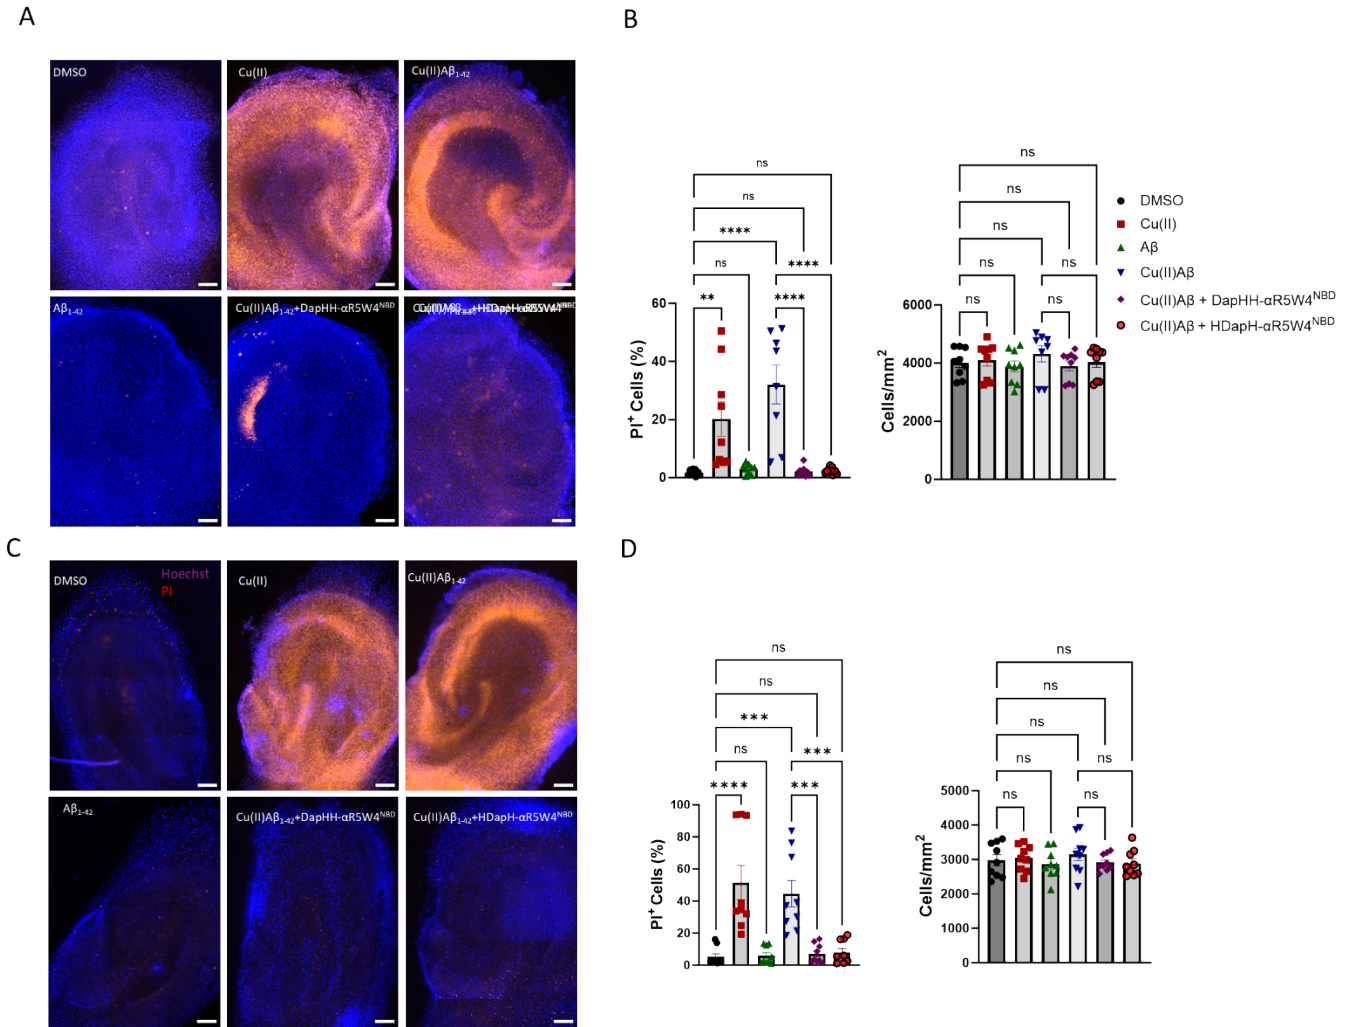

Figure S11: (A) Effect of monomeric Cu(II)(A $\beta_{1-42}$ ) or (B) aggregated Cu(II)(A $\beta_{1-42}$ ) on OHSC toxicity. Representative images of the effect of Cu(II) peptide shuttles on Cu(II)(A $\beta_{1-42}$ )-induced toxicity on OHSC with analysis of the preventive effect of DapHH- $\alpha$ R5W4<sup>NBD</sup> or HDapH- $\alpha$ R5W4<sup>NBD</sup> and analysis of the cell density in OHSCs culture after 48h treatment. Conditions: 10  $\mu$ M Cu(II), DapHH- $\alpha$ R5W4<sup>NBD</sup> or HDapH- $\alpha$ R5W4<sup>NBD</sup>, 20  $\mu$ M A $\beta_{42}$  monomer or aggregates. Hoechst is blue and PI red. Scale: 200 $\mu$ m. A non-parametric test was carried out with a Kruskal-Wallis Multiple Comparison Test for Cells/mm<sup>2</sup> for both A $\beta_{40}$  and A $\beta_{42}$ . A parametric ordinary one-way ANOVA test was carried out with a Tukey's Multiple Comparison Test for PI<sup>+</sup> cells for all analysis, \*\* p<0,01, \*\*\* p<0,001, \*\*\*\* p<0,0001. n=3 independent experiments with at least 3 slices per condition.

A

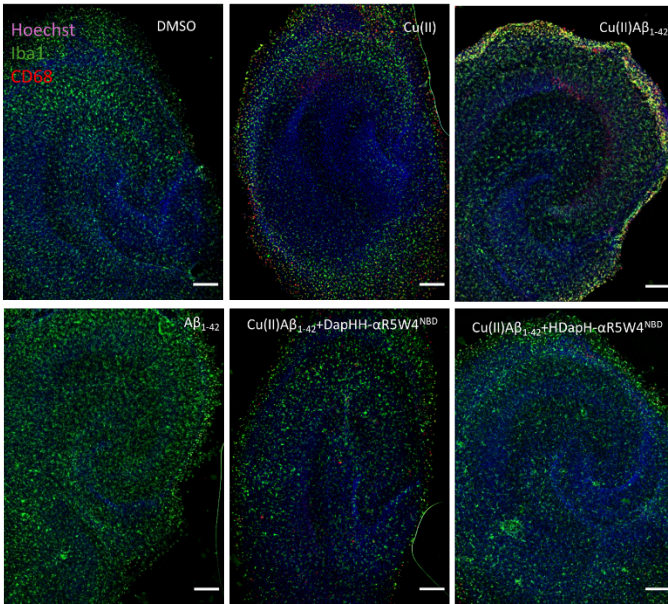

B

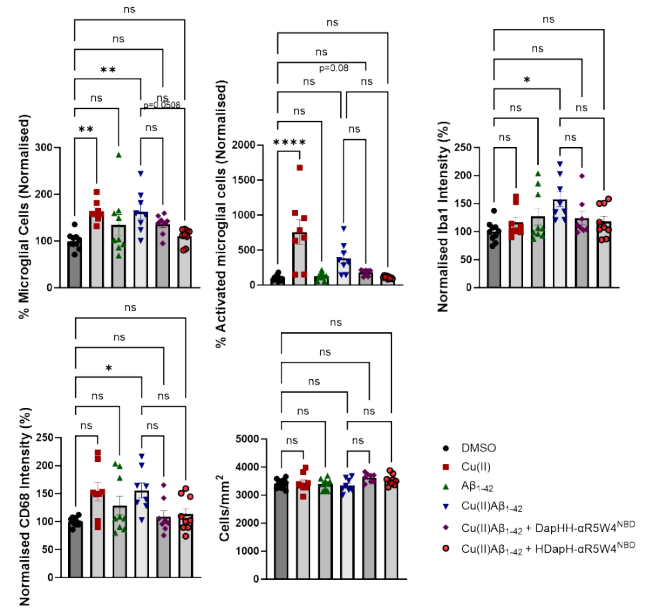

Figure S12: (A) Representative images of the effect of Cu(II) peptide shuttles on Cu-induced Cu(II)A $\beta_{1-42}$  microglia activation on OHSC with (B) analysis of the preventive effect of DapHH- $\alpha$ R5W4<sup>NBD</sup> or HDapH- $\alpha$ R5W4<sup>NBD</sup> on Cu(II)(A $\beta_{1-42}$ ) induced microglia proliferation, activation, and analysis of the cell density in OHSCs culture after 48h treatment. Hoechst is blue, Iba1 green and CD68 red. Scale: 200 $\mu$ m. Conditions: 10  $\mu$ M Cu(II)=DapHH- $\alpha$ R5W4<sup>NBD</sup> or HDapH- $\alpha$ R5W4<sup>NBD</sup>, 20  $\mu$ M A $\beta_{1-42}$ . A non-parametric test was carried out with a Kruskal-Wallis Multiple Comparison Test for normalized Iba1 intensity for A $\beta_{1-42}$ . A parametric ordinary one-way ANOVA test was carried out with a Tukey's Multiple Comparison Test for the rest, \* p<0,05, \*\* p<0,01, \*\*\* p<0,001, \*\*\*\* p<0,0001. n=3 independent experiments with at least 3 slices per condition.
